# Supplementary material
Source: publisher site journal article supplement (http://www.spandidos-publications.com/3960/downloadSupplementary)
Supplement: Supplementary file 1 [file downloadSupplementary]

## Sheet: FTC_vs_FT_down_enrichment
Table SXII. KEGG Enrichment of downregulated differentially expressed genes between fallopian tube cancer and healthy fallopian tube tissue groups.
KEGG ID	P-value	OddsRatio	ExpCount	Count	Size	Term
3000	0.000197713	2.43608	10.7759	24	1222	Transcription factors
4080	9.60239e-05	4.7708	2.25747	10	256	Neuroactive ligand-receptor interaction
4014	0.0249282	2.37021	3.50085	8	397	Ras signaling pathway
4022	0.00559102	3.1397	2.67193	8	303	cGMP-PKG signaling pathway
4030	0.036073	2.1973	3.7654	8	427	G protein-coupled receptors
4020	0.0137135	2.89088	2.52202	7	286	Calcium signaling pathway
4024	0.0473427	2.20058	3.28039	7	372	cAMP signaling pathway
4310	0.00505611	3.53057	2.08111	7	236	Wnt signaling pathway
4928	0.00214827	4.15293	1.78129	7	202	Parathyroid hormone synthesis, secretion and action
4052	0.00532403	3.97123	1.58729	6	180	Cytokines and growth factors
3310	0.000201549	10.284	0.537914	5	61	Nuclear receptors
4723	0.0457248	2.65832	1.94002	5	220	Retrograde endocannabinoid signaling
4740	0.00740267	4.34711	1.2081	5	137	Olfactory transduction
561	0.0200801	4.04391	1.03174	4	117	Glycerolipid metabolism
410	0.0306741	4.61479	0.679006	3	77	beta-Alanine metabolism
4923	0.0327437	4.49292	0.696642	3	79	Regulation of lipolysis in adipocytes
601	0.0341498	7.31927	0.291003	2	33	Glycosphingolipid biosynthesis - lacto and neolacto series
5033	0.048478	5.96899	0.35273	2	40	Nicotine addiction
